# Supplementary material
Source: Springer Nature journal article supplement (https://www.springermedizin.de/resource/supplementary/12916_2013_1100_MOESM4_ESM.pdf/9598454)
Supplement: MOESM4 [file 9598454]

# Additional file 4 Comparison of priority symptoms for cholera in endemic areas of three African settings, by site and gender

|                              | SE-DRC, n=360 |             |              |             |              | Western Kenya, n=379 |             |             |             |              | Zanzibar, n=356 |             |             |             |              |
|------------------------------|---------------|-------------|--------------|-------------|--------------|----------------------|-------------|-------------|-------------|--------------|-----------------|-------------|-------------|-------------|--------------|
|                              |               |             |              |             |              |                      |             |             |             |              |                 |             |             |             |              |
| a. Overall                   | Total rep.    |             | Prom.        |             |              | Total rep.           |             | Prom.       |             |              | Total rep.      |             | Prom.       |             |              |
| Loss of appetite             | 86.7          |             | 1.24         |             |              | <b>91.3</b>          |             | <b>1.10</b> |             |              | 87.9            |             | 1.04        |             |              |
| Sunken eyes <sup>a</sup> *** | <b>97.5</b>   |             | <b>1.44</b>  |             |              | <b>93.9</b>          |             | <b>1.00</b> |             |              | <b>94.9</b>     |             | <b>1.26</b> |             |              |
| Unconsciousness***           | <b>90.3</b>   |             | <b>1.44</b>  |             |              | 74.4                 |             | 0.94        |             |              | <b>91.6</b>     |             | <b>1.62</b> |             |              |
| Weakness <sup>b</sup> ***    | <b>98.3</b>   |             | <b>2.61</b>  |             |              | <b>94.7</b>          |             | <b>1.55</b> |             |              | <b>97.2</b>     |             | <b>1.88</b> |             |              |
| Cannot say***                | 4.7           |             | 0.12         |             |              | 37.5                 |             | 1.26        |             |              | 18.5            |             | 0.40        |             |              |
| b. Site comparison           | Urban         |             | Rural        |             |              | Urban                |             | Rural       |             |              | Urban           |             | Rural       |             |              |
|                              | Total rep.    | Prom.       | Total rep.   | Prom.       | p value      | Total rep.           | Prom.       | Total rep.  | Prom.       | p value      | Total rep.      | Prom.       | Total rep.  | Prom.       | p value      |
| Blood in stool               | 18.3          | 0.23        | 18.3         | 0.20        | 0.853        | 61.1                 | 0.70        | 55.0        | 0.77        | 0.535        | <b>23.5</b>     | <b>0.28</b> | <b>50.3</b> | <b>0.60</b> | <0.001       |
| Loose skin                   | <b>97.2</b>   | <b>1.33</b> | <b>96.7</b>  | <b>1.43</b> | <b>0.035</b> | 85.8                 | 0.93        | 83.6        | 0.93        | 0.640        | 90.5            | 1.09        | 88.1        | 1.11        | 0.737        |
| Loss of appetite             | 82.2          | 1.25        | 91.1         | 1.23        | 0.994        | <b>94.2</b>          | <b>1.14</b> | <b>88.4</b> | <b>1.06</b> | <b>0.042</b> | <b>92.2</b>     | <b>1.16</b> | <b>83.6</b> | <b>0.92</b> | <0.001       |
| Mucus in stool               | 39.4          | 0.47        | 38.3         | 0.43        | 0.716        | 62.1                 | 0.64        | 59.8        | 0.67        | 0.844        | <b>8.9</b>      | <b>0.09</b> | <b>37.9</b> | <b>0.38</b> | <0.001       |
| Nausea                       | <b>88.9</b>   | <b>1.14</b> | <b>91.7</b>  | <b>1.00</b> | <b>0.043</b> | 86.8                 | 0.91        | 84.1        | 0.92        | 0.939        | 87.7            | 0.93        | 88.1        | 0.93        | 0.991        |
| Palpitations                 | 75.6          | 0.93        | 91.1         | 0.99        | 0.235        | 67.9                 | 0.70        | 62.4        | 0.77        | 0.570        | <b>84.4</b>     | <b>1.16</b> | <b>73.4</b> | <b>0.80</b> | <0.001       |
| Rectal pain                  | <b>63.9</b>   | <b>0.72</b> | <b>52.8</b>  | <b>0.56</b> | <b>0.012</b> | 75.8                 | 0.77        | 67.7        | 0.70        | 0.090        | 69.3            | 0.69        | 73.4        | 0.79        | 0.270        |
| Sunken eyes                  | <b>96.1</b>   | <b>1.30</b> | <b>98.9</b>  | <b>1.57</b> | <0.001       | 95.3                 | 1.03        | 92.6        | 0.98        | 0.105        | <b>93.9</b>     | <b>1.15</b> | <b>96.0</b> | <b>1.37</b> | <0.001       |
| Unconsciousness              | 87.2          | 1.47        | 93.3         | 1.41        | 0.733        | 75.3                 | 0.84        | 73.5        | 1.05        | 0.210        | <b>92.7</b>     | <b>1.94</b> | <b>90.4</b> | <b>1.30</b> | <0.001       |
| Weakness <sup>b</sup>        | <b>96.7</b>   | <b>2.37</b> | <b>100.0</b> | <b>2.86</b> | <b>0.003</b> | 98.9                 | 1.61        | 90.5        | 1.49        | 0.257        | 96.6            | 1.92        | 97.7        | 1.84        | 0.209        |
| Cannot say                   | 3.9           | 0.12        | 5.6          | 0.13        | 0.816        | <b>34.7</b>          | <b>1.09</b> | <b>40.2</b> | <b>1.42</b> | <b>0.036</b> | 15.1            | 0.32        | 22.0        | 0.47        | 0.090        |
| c. Gender comparison         | Female        |             | Male         |             |              | Female               |             | Male        |             |              | Female          |             | Male        |             |              |
|                              | Total rep.    | Prom.       | Total rep.   | Prom.       | p value      | Total rep.           | Prom.       | Total rep.  | Prom.       | p value      | Total rep.      | Prom.       | Total rep.  | Prom.       | p value      |
| Fever                        | 84.5          | 0.88        | 82.7         | 0.89        | 0.887        | <b>64.9</b>          | <b>0.70</b> | <b>74.6</b> | <b>0.83</b> | <b>0.044</b> | 85.5            | 0.91        | 84.2        | 0.98        | 0.679        |
| Palpitations                 | 84.5          | 0.96        | 82.1         | 0.96        | 0.956        | <b>70.1</b>          | <b>0.84</b> | <b>60.0</b> | <b>0.62</b> | <b>0.016</b> | 79.3            | 1.01        | 78.5        | 0.95        | 0.562        |
| Very thirsty                 | 89.0          | 1.12        | 88.3         | 1.02        | 0.249        | 82.0                 | 0.87        | 86.5        | 0.93        | 0.275        | <b>83.2</b>     | <b>0.93</b> | <b>71.8</b> | <b>0.79</b> | <b>0.021</b> |

Categories ordered alphabetically, except for “cannot say.” ‘Total rep.’=‘Total reported,’ referring to percentage of categories reported spontaneously and upon probing. ‘Prom.’=‘Prominence,’ referring to mean prominence of categories based on how reported (spontaneous=2, probed=1, most troubling=3). <sup>a</sup> This category considered among the top three in Western Kenya although prominence for “cannot say” was higher. <sup>b</sup> One response missing in Western Kenya (n=378). Panel a: Figures in bold designate top three prominent categories; comparison between settings based on Kruskal Wallis test, \*\*\* p<0.001. Panels b and c: Figures in bold designate significant differences at p<0.05 based on Wilcoxon test. SE-DRC: Southeastern Democratic Republic of Congo.

Data for Zanzibar in panel b from: Schaetti C, Khatib AM, Ali SM, Hutubessy R, Chaignat CL, Weiss MG: **Social and cultural features of cholera and shigellosis in peri-urban and rural communities of Zanzibar.** *BMC Infect Dis* 2010, **10**:339. Data for Western Kenya in panel a and b from: Nyambetha EO, Sundaram N, Schaetti C, Akeyo L, Chaignat CL, Hutubessy R, Weiss MG: **Distinguishing social and cultural features of cholera in urban and rural areas of Western Kenya: Implications for public health.** *Glob Public Health* 2013, **8**:534-551.
